# Supplementary material for: Whole-brain mapping reveals the divergent impact of ketamine on the dopamine system
Source: PubMed Central journal article supplement — Cell Rep. Author manuscript; Available in PMC 2024 Feb 5. (PMC10843582; doi:10.1016/j.celrep.2023.113491), 2023-12-04
Supplement: NIHMS1954781-supplement-1.pdf [file NIHMS1954781-supplement-1.pdf]

**Cell Reports, Volume 42**

**Supplemental information**

**Whole-brain mapping reveals the divergent  
impact of ketamine on the dopamine system**

**Malika S. Datta, Yannan Chen, Shradha Chauhan, Jing Zhang, Estanislao Daniel De La Cruz, Cheng Gong, and Raju Tomer**

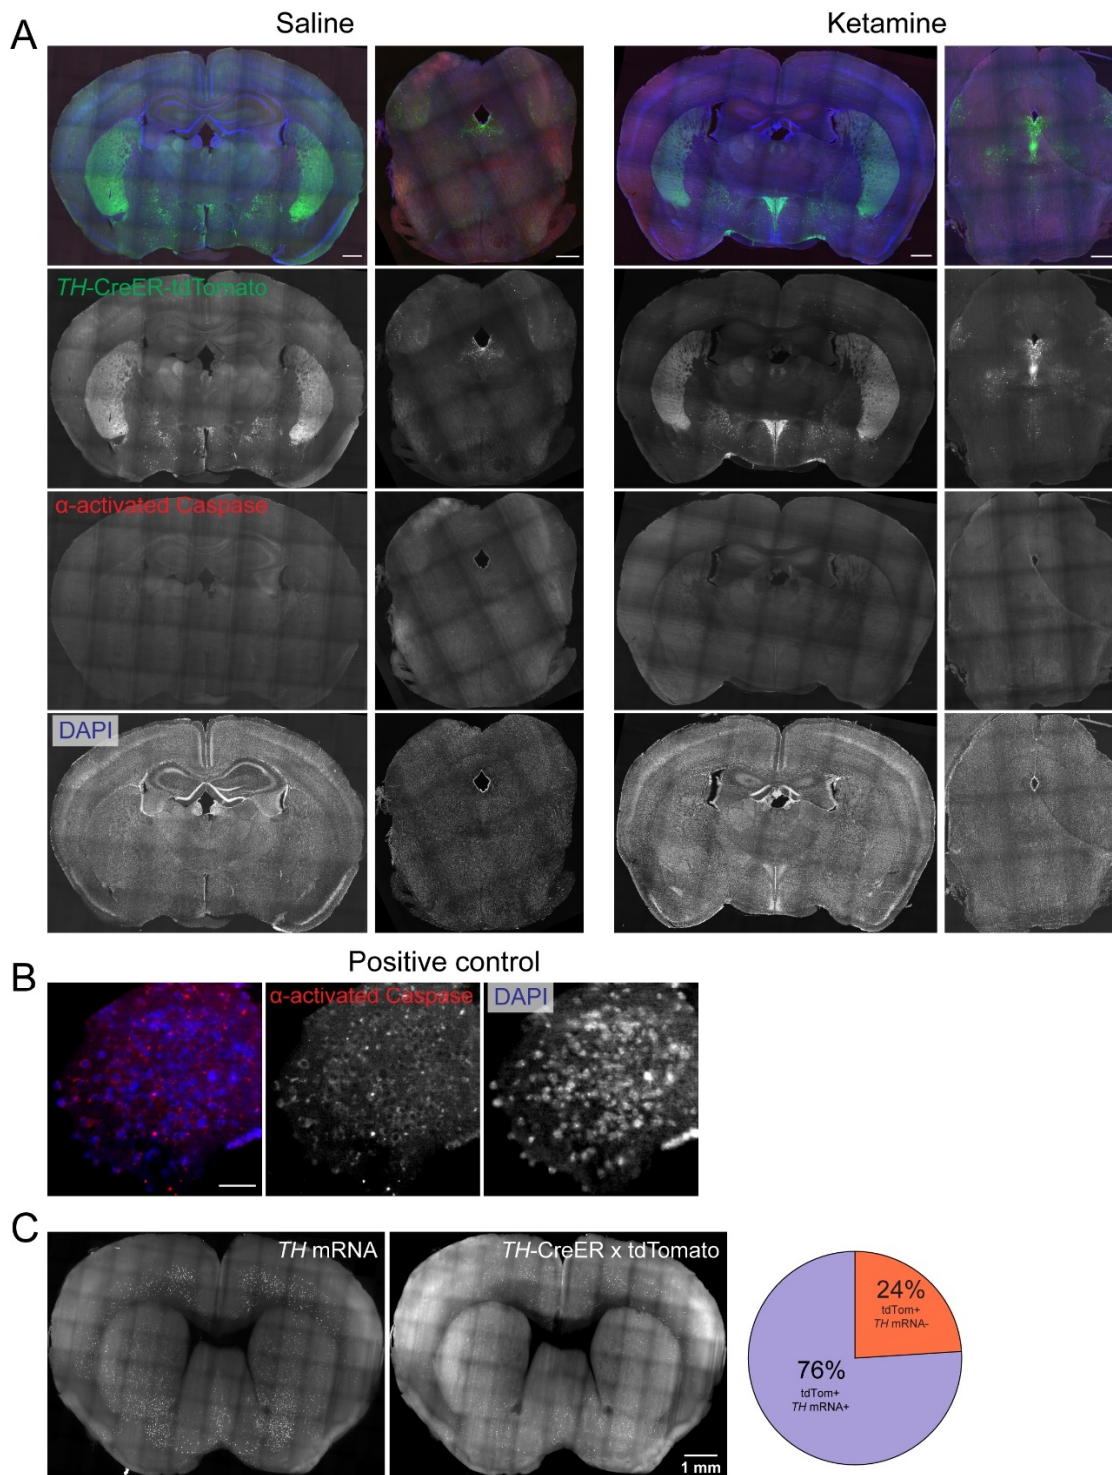

**Figure S1. Activated caspase immunostaining, Related to Figure 2.** (A) Representative images showing activated caspase immunostainings in 10 day ketamine i.p. injected animals. All scale bars are 1 mm. (B) Positive control for activated caspase immunostaining on a stressed neuronal culture. Scale bar represents 50  $\mu$ m. (C) Characterization of *TH*-CreER transgenic line. Co-localization of *TH* mRNA and *TH*-CreER x tdTomato signal is shown and all the non-cortical overlap is quantified in the pie chart. Scale bar represents 1 mm.

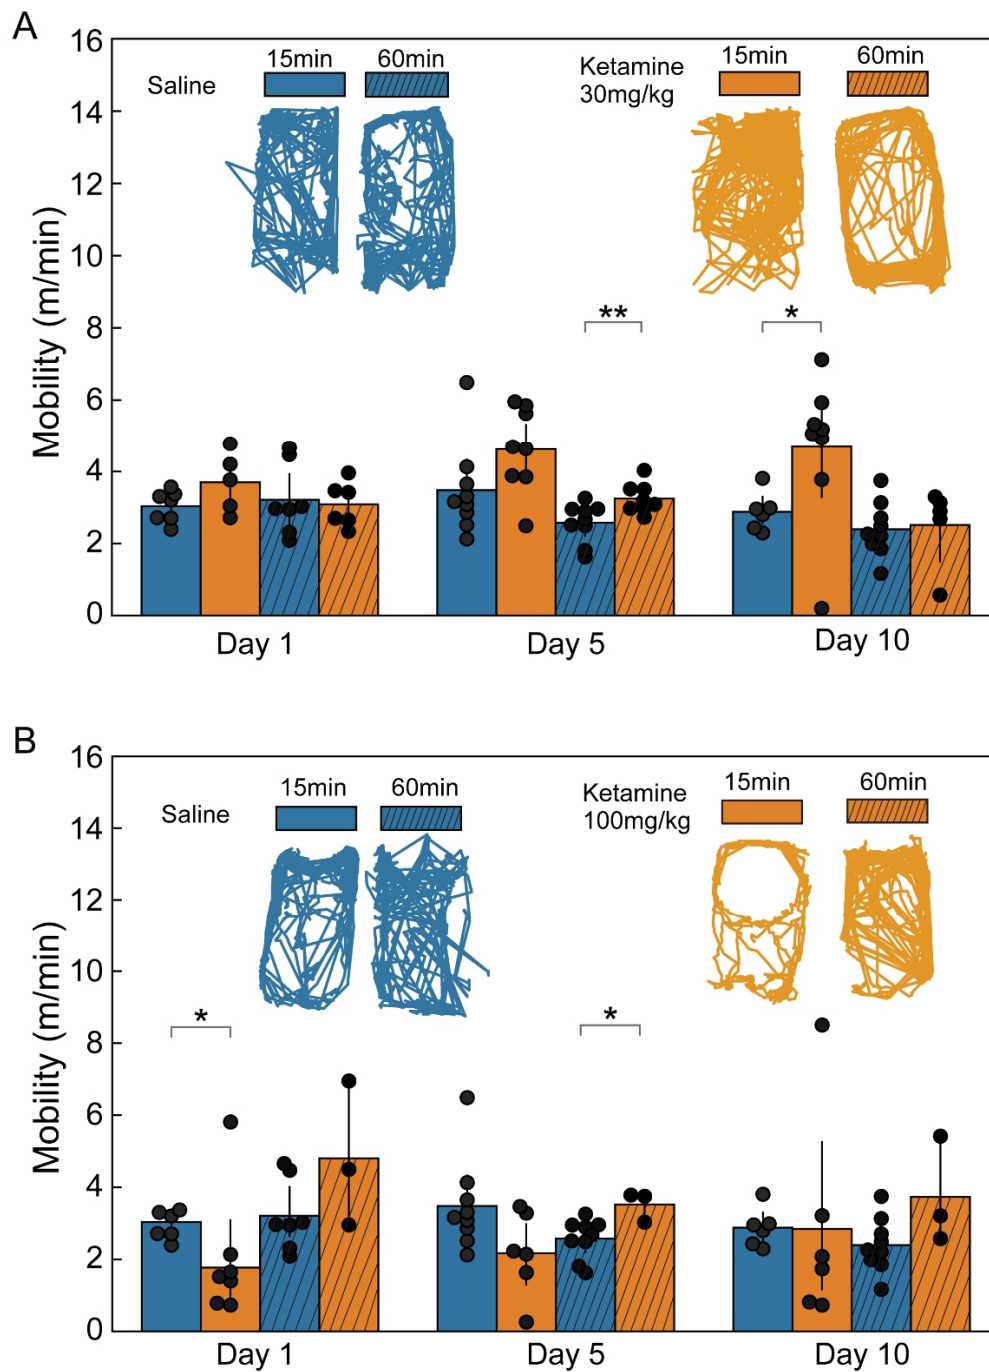

**Figure S2. Locomotion behavior quantification, Related to Figure 2.** (A) Quantification of mobility 15 and 60 minutes after daily i.p. injections of 30 mg/kg ketamine. (B) Quantification of mobility 15 and 60 minutes after daily i.p. injections of 100 mg/kg ketamine. Data are represented as mean $\pm$ 1.96SD (95% confidence interval). Statistics was done by using two-sided Mann-Whitney U test of the compared pair of Saline vs. Ketamine treated. \* denotes pvalue < 0.05, \*\* < 0.01.

**Table S1. HCR oligo probes used for *TH* mRNA detection, Related to Figure 5.**

| <u>Sequences</u>                                            |
|-------------------------------------------------------------|
| GAG GAG GGC AGC AAA CGG AAT GAA GCC CTT GGG CTG TGG CGA GGA |
| GAG GAG GGC AGC AAA CGG AAC CGC TCC TTG CGG GCA TCC TCG ATG |
| GAG GAG GGC AGC AAA CGG AAT CCC AGG TTC CGC GGA GGC TAC CGC |
| GAG GAG GGC AGC AAA CGG AAT TGA GAA CAG CAT TTC CAT CCC TCT |
| GAG GAG GGC AGC AAA CGG AAC AAA GCC CGA GAC AGT GAG GAG GGT |
| GAG GAG GGC AGC AAA CGG AAT CGA AGC GCA CAA AGT ACT CCA GGT |
| GAG GAG GGC AGC AAA CGG AAA GAC ACC CGA CGC ACA GAA CTG AGG |
| GAG GAG GGC AGC AAA CGG AAC TTT CCT TGG GAA CCA GGG AAC CTT |
| GAG GAG GGC AGC AAA CGG AAA GGT CAG GGT CAA ACT TGG TGA CCA |
| GAG GAG GGC AGC AAA CGG AAC TTC CGG CGC TGG CGA TAC GCC TGG |
| GAG GAG GGC AGC AAA CGG AAA GCG TGG CGT ATA CCT CCT TCC AGG |
| GAG GAG GGC AGC AAA CGG AAC TGG AAA GCC TCC AGG TGT TCC CGG |
| GAG GAG GGC AGC AAA CGG AAC CTC CAG CTG TGG AAT GCT GTC CTC |
| GAG GAG GGC AGC AAA CGG AAG CCA CGG GTC GCA GCT GGA AGC CAG |
| GAG GAG GGC AGC AAA CGG AAA AAC ACA CGG AAG GCC AGA CTG GCC |
| GAG GAG GGC AGC AAA CGG AAG CTC GGG TGA GTG CAT AGG TGA GGA |
| GAG GAG GGC AGC AAA CGG AAG TGC GGT CAG CCA ACA TGG GTA CGT |
| GAG GAG GGC AGC AAA CGG AAA TCT GAA GCC CCC AGA GAT GCA AGT |
| GAG GAG GGC AGC AAA CGG AAG CCC AAA CTC CAC AGT GAA CCA GTA |
| GAG GAG GGC AGC AAA CGG AAG AAG ACA GCA GCC CTG CAC CGT AAG |
| TGG TAT CCT GCT CTG AGA CGG CTC TTA GAA GAG TCT TCC TTT ACG |
| AGC CGC TGC TGC AGC TGC TGC TGC CTA GAA GAG TCT TCC TTT ACG |
| CCT CGA ATA CCA CAG CCT CCA ATG GTA GAA GAG TCT TCC TTT ACG |
| TTT GTA CCC CTC AAG GAG AAG AGC ATA GAA GAG TCT TCC TTT ACG |
| TTT GGC TTC AAA TGT CTC AAA CAC TTA GAA GAG TCT TCC TTT ACG |
| AGG GCA GCC AGG TCG CCA CTG GGC ATA GAA GAG TCT TCC TTT ACG |
| GTC CTC TCT GGC ACT GCG CAC ATC GTA GAA GAG TCT TCC TTT ACG |
| GGT GGT GAC ACT TAT CCA ACT CTG ATA GAA GAG TCT TCC TTT ACG |
| TCA GAG AAG CCC GGA TGG TCC AGG TTA GAA GAG TCT TCC TTT ACG |
| GTA TTG GAA GGC AAT CTC TGC AAT CTA GAA GAG TCT TCC TTT ACG |
| CAG GCA TGG GTA GCA TAG AGG CCC TTA GAA GAG TCT TCC TTT ACG |
| TCG GTA GCC ACA GTA CCG TTC CAG ATA GAA GAG TCT TCC TTT ACG |
| TCC GTT CCT TCA AGA AGT GAG ACA CTA GAA GAG TCT TCC TTT ACG |

|                                                             |
|-------------------------------------------------------------|
| AGA AAA TCA CGG GCA GAC AGT AGA CTA GAA GAG TCT TCC TTT ACG |
| GGC ATG ACG GAT GTA CTG TGT GCA CTA GAA GAG TCT TCC TTT ACG |
| GTC CCA GCA GCT CGT GGC AGC AGT CTA GAA GAG TCT TCC TTT ACG |
| CCA ATG TCC TGG GAG AAC TGG GCA ATA GAA GAG TCT TCC TTT ACG |
| CAC CGT GGA GAG TTT TTC AAT TTC TTA GAA GAG TCT TCC TTT ACG |
| CCT TCA GCT CCC CAT TCT GTT TAC ATA GAA GAG TCT TCC TTT ACG |
| GAC AGG GAG TGC AGG AGC TCT CCA TTA GAA GAG TCT TCC TTT ACG |
